# Supplementary material for: Asymmetric reduction of ethynyl ketones and ethynylketoesters by secondary alcohol dehydrogenase from Thermoanaerobacter ethanolicus †
Source: Royal Society of Chemistry journal article supplement (doi:10.1039/b001329n), 2000-01-01
Supplement: b001329n.doc [file b001329n.doc]

# Supplementary data

**Asymmetric reduction of ethynylketones and ethynylketoesters by secondary alcohol dehydrogenase from *Thermoanaerobacter ethanolicus***

**Christian Heiss and Robert S. Phillips**

*Department of Chemistry, Department of Biochemistry and Molecular Biology, and Center for Metalloenzyme Studies, University of Georgia, Athens, Georgia 30602-2556, USA*

**Experimental details for the preparation of compounds 7a–k**

**Preparation of ethynylketones (7a-k)**1

A solution of acyl chloride (**9)** (10.0 mmol) and BTMSA (1.87 g, 11.0 mmol) in dry CH2Cl2 (25 cm3) was cooled to 0 C and AlCl3 (1.60 g, 12.0 mmol) was added in portions during 30 min. The mixture was stirred for 2 h at 0 C and for 2 h at rt and then poured into a 1 : 1 mixture of 1 *M* HCl and ice (50 cm3). The layers were separated and the aqueous phase extracted with CH2Cl2 (3  30 cm3). The combined organic extracts were dried with Na2SO4 and the solvent was removed *in vacuo*. The residue was taken up in Et2O (40 cm3) and the resulting solution was stirred vigorously overnight with an aqueous solution of NaF (0.462 g, 11.0 mmol) and NBu4Cl (0.31 g, 1.1 mmol). The layers were separated and the aqueous layer extracted with Et2O (3  25 cm3). The combined organic extracts were dried with Na2SO4, the solvent was removed *in vacuo*, and the residue chromatographed on silica gel.

**1-Pentyn-3-one (7b).** (0.62 g, 75 %), 1H-NMR (300 MHz, CDCl3)  3.21 (s, 1H), 2.62 (q, *J* = 7.4 Hz, 2H), 1.15 (t, *J* = 7.5 Hz, 3H).

**4-Methyl-1-pentyn-3-one (7c).** (0.62 g, 65 %), 1H-NMR (250 MHz, CDCl3)  3.23 (s, 1H), 2.68 (m, 1H), 1.21 (d, *J* = 6.8 Hz, 6H).

**4,4-Dimethyl-1-pentyn-3-one (7d).** (0.73 g, 66 %), 1H-NMR (300 MHz, CDCl3)  3.24 (s, 1H), 1.22 (s, 9H).

**1-Hexyn-3-one (7e).** (0.70 g, 73 %), 1H-NMR (300 MHz, CDCl3)  3.20 (s, 1H), 2.57 (t, *J* = 7.4 Hz, 2H), 1.71 (m, 2H), 0.96 (t, *J* = 7.4 Hz, 3H).

**5-Methyl-1-hexyn-3-one (7f).** (0.51 g, 46 %), 1H-NMR (300 MHz, CDCl3)  3.20 (s, 1H), 2.47 (d, *J* = 7.1 Hz, 2H), 2.27 (m, 1H), 0.97 (d, *J* = 6.3 Hz, 6H).

**5,5-Dimethyl-1-hexyn-3-one (7g).** (0.78 g, 63 %), 1H-NMR (250 MHz, CDCl3)  3.23 (s, 1H), 2.51 (s, 2H), 1.06 (s, 9H).

**1-Heptyn-3-one (7h).** (0.63 g, 57 %), 1H-NMR (250 MHz, CDCl3)  3.20 (s, 1H), 2.59 (t, *J* = 7.4 Hz, 2H), 1.67 (m, 2H), 1.36 (m, 2H), 0.93 (t, *J* = 7.3 Hz, 3H).

**4-Methyl-1-heptyn-3-one (7i).** (0.72 g, 58 %), 1H -NMR (250 MHz, CDCl3)  3.22 (s, 1H), 2.59 (m, *J* = 6.8 Hz, 1H), 1.79 (m, 1H), 1.39 (m, 3H), 1.19 (d, *J* = 7.2 Hz, 3H), 0.93 (t, *J* = 7.2 Hz, 3H). 13C-NMR (75 MHz, CDCl3)  191.1, 80.9, 79.0, 48.1, 34.5, 20.1, 15.5, 13.9.

**6-Methyl-1-heptyn-3-one (7k).** (0.61 g, 49 %), 1H-NMR (250 MHz, CDCl3)  3.22 (s, 1H), 2.58 (t, *J* = 7.5 Hz, 2H), 1.57 (m, 3H), 0.89 (d, *J* = 6.0 Hz, 6H).

**Preparation of methyl and ethyl ethynylketoesters (5)**2

To a suspension of AlCl3 (4.00 g, 30.0 mmol) in CH2Cl2 (40 cm3), cooled to 0 C, was added dropwise over 30 min a solution of the appropriate acyl chloride (**11)** (10.0 mmol) and *bis*(trimethylsilyl)acetylene (1.87 g, 11.0 mmol) in CH2Cl2 (15 cm3). After the addition was complete, the mixture was stirred 2 h at 0 C and 2 h at rt. and poured into a 1:1 mixture of 1 *M* HCl and ice (50 cm3). The layers were separated and the aqueous phase extracted with CH2Cl2 (3  30 cm3). The combined organic extracts were dried with Na2SO4 and the solvent was removed *in vacuo*. The residue was taken up in Et2O (40 cm3), and desilylated as described above for **7**.

**Methyl 4-oxo-5-hexynoate (5a).** (1.18 g, 84 %), 1H-NMR (250 MHz, CDCl3)  3.70 (s, 3H), 3.27 (s, 1H), 2.95 (t, *J* = 6.6 Hz, 2H), 2.66 (t, *J* = 6.6 Hz 2H).

**Ethyl 4-oxo-5-hexynoate (5b).** (0.94 g, 61 %), (Found: C, 62.2; H, 6.5. Calc. for C8H10O3: C, 62.3; H, 6.5 %); max(film)/cm-1 3255, 2094, 1731 and 1686 cm -1. 1H-NMR (250 MHz, CDCl3)  4.15 (q, *J* = 7.2 Hz, 2H), 3.26 (s, 1H), 2.94 (t, *J* = 6.6 Hz, 2H), 2.65 (t, *J* = 6.7 Hz, 2H), 1.24 (t, *J* = 7.0 Hz, 3H); 13C-NMR (75 MHz, CDCl3)  184.9, 171.8, 80.9, 79.1, 60.8, 39.9, 27.7, 14.1. Anal.

**Ethyl 5-oxo-6-heptynoate (5d).** Yield 1.09 g (65 %), Rf 0.22 (10 % ethyl acetate/hexanes), IR (neat) 3248, 2092, 1733, 1684 cm -1. 1H-NMR (250 MHz, CDCl3)  4.14 (q, *J* = 7.1 Hz, 2H), 3.23 (s, 1H), 2.69 (t, *J* = 7.3 Hz, 2H), 2.36 (t, *J* = 7.3 Hz, 2H), 1.99 (m, 2H), 1.26 (t, *J* = 7.2 Hz, 3H).

**Methyl 6-oxo-7-octynoate (5f).** Yield 1.36 g (81 %), Rf 0.20 (10 % ethyl acetate/hexanes), IR (neat) 3249, 2092, 1735, 1683 cm -1. 1H-NMR (300 MHz, CDCl3)  3.64 (s, 3H), 3.23 (s, 1H), 2.60 (t, *J* = 6.9 Hz, 2H), 2.31 (t, *J* = 6.9 Hz, 2H), 1.66 (m, 4H); 13C-NMR (75 MHz, CDCl3)  186.7, 173.6, 81.2, 78.6, 51.5, 44.9, 33.6, 24.0, 23.0. Anal. Calcd for C9H12O3: C, 64.27; H, 7.19. Found: C, 63.74; H, 7.25.

**Preparation of isopropyl ethynylketoesters**

A 25 ml round-bottom flask fitted with an inverse Dean-Stark trap was charged with the appropriate acid **14**3 (10.0 mmol), 2-PrOH (3.82 cm3, 50.0 mmol), CHCl3 (5.0 cm3), and PTSA (50 mg, 0.29 mmol). The solution was heated to reflux for 20 h, and, after cooling, washed with water and dried with Na2SO4. The solvent was removed in vacuo and the residue was taken up in Et2O. Desilylation and workup were performed as described above.

**Isopropyl 4-Oxo-5-hexynoate (5c).** Yield 1.41 g (84 %), Rf 0.21 (10 % ethyl acetate/hexanes), IR (neat) 3253, 2094, 1729, 1685 cm -1.1H-NMR (250 MHz, CDCl3)  5.00 (m, 1H), 3.26 (s, 1H), 2.91 (t, *J* = 6.6 Hz, 2H), 2.61 (t, *J* = 6.6 Hz, 2H), 1.22 (d, *J* = 6.2 Hz, 6H); 13C-NMR (62.5 MHz, CDCl3)  185.0, 171.2, 80.9, 78.9, 68.2, 39.9, 28.0, 21.6. Anal. Calcd for C9H12O3: C, 64.27; H, 7.19. Found: C, 64.29; H, 7.18.

**Isopropyl 5-Oxo-6-heptynoate (5e).** Yield 1.35 g (74 %), Rf 0.25 (10 % ethyl acetate/hexanes), IR (neat) 3249, 2092, 1728, 1684 cm-1. 1H-NMR (300 MHz, CDCl3)  5.00 (m, 1H,), 3.23 (s, 1H), 2.67 (t, *J* = 7.1 Hz, 2H), 2.32 (t, *J* = 7.4 Hz, 2H), 1.97 (m, 2H), 1.22 (d, *J* = 6.1 Hz, 6H); 13C-NMR (75 MHz, CDCl3)  186.4, 172.3, 81.3, 78.7, 67.8, 44.3, 33.3, 21.8, 18.8. Anal. Calcd for C10H14O3: C, 65.92; H, 7.74. Found: C, 65.88; H, 7.72.

## References

D. R. M. Walton and F. Waugh, *J. Organomet. Chem.*, 1972, **37**, 45.

R. A. Earl and K. P. C. Vollhardt, *J. Org. Chem.*, 1984, **49**, 4786.

N. K. Nayyar, D. R. Hutchinson, M. J. Martinelli, *J. Org. Chem.*, 1997, **62**, 982.
